# Supplementary material
Source: Springer Nature journal article supplement (https://www.springermedizin.de/resource/supplementary/12933_2012_495_MOESM2_ESM.pdf/9538638)

# Postprandial Endothelial Function

ANOVA P = 0.203

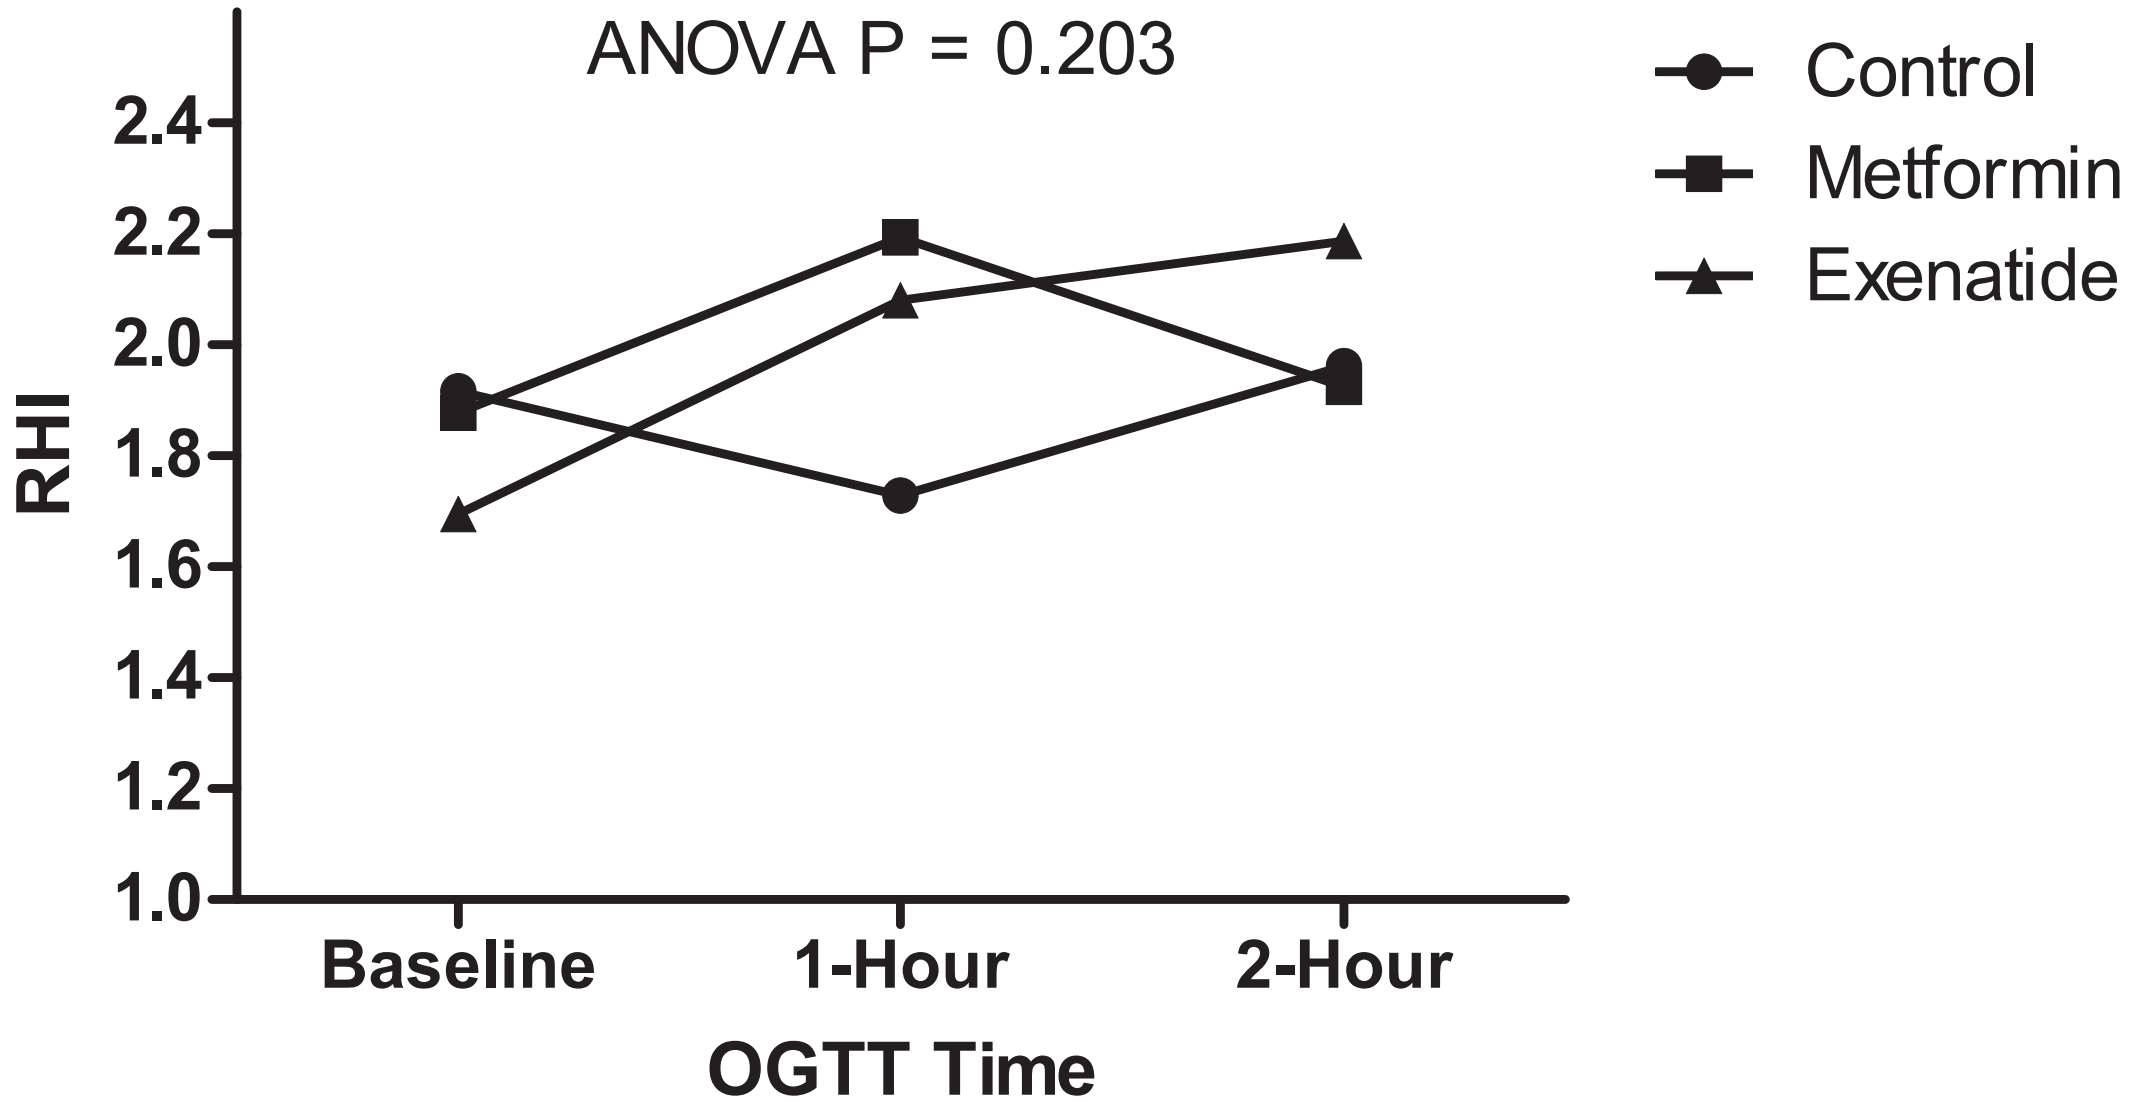

Supplement: MOESM2 [file 9538638]
